# Supplementary material for: Predicting melting points of quaternary ammonium ionic liquidsElectronic supplementary information (ESI) available: training sets B and C. See http://www.rsc.org/suppdata/gc/b3/b301217d/
Source: Royal Society of Chemistry journal article supplement (doi:10.1039/b301217d), 2003-01-01
Supplement: b301217d(1).pdf [file b301217d%281%29.pdf]

## Tetraalkyl-Ammonium Bromide Training Set

| Number | Cation Name                                     | $T_{m,exp} / ^\circ\text{C}$ | $T_{m,pred} / ^\circ\text{C}$ with eqn. 2 |
|--------|-------------------------------------------------|------------------------------|-------------------------------------------|
| 1      | tributyl-(3-methylbutyl)-ammonium               | 17                           | 46.5                                      |
| 2      | butyl-dodecyl-dimethyl-ammonium                 | 40                           | 140.7                                     |
| 3      | dimethyl-ditetradecyl-ammonium                  | 50                           | 107.4                                     |
| 4      | dibutyl-hexadecyl-methyl-ammonium               | 51                           | 95.9                                      |
| 5      | tributyl-hexyl-ammonium                         | 52                           | 114.0                                     |
| 6      | dodecyl-tripropyl-ammonium                      | 56                           | 101.6                                     |
| 7      | dimethyl-octadecyl-octyl-ammonium               | 57                           | 112.5                                     |
| 8      | decyl-dimethyl-octadecyl-ammonium               | 60                           | 107.4                                     |
| 9      | dimethyl-octadecyl-tetradecyl-ammonium          | 62                           | 98.7                                      |
| 10     | dodecyl-dimethyl-octadecyl-ammonium             | 62                           | 102.8                                     |
| 11     | triheptyl-propyl-ammonium                       | 65                           | 93.5                                      |
| 12     | dihexadecyl-dimethyl-ammonium                   | 65                           | 98.7                                      |
| 13     | diethyl-hexadecyl-methyl-ammonium               | 71                           | 119.0                                     |
| 14     | trioctyl-propyl-ammonium                        | 71                           | 85.8                                      |
| 15     | tributyl-hexadecyl-ammonium                     | 75                           | 83.4                                      |
| 16     | hexadecyl-dimethyl-pentyl-ammonium              | 76                           | 126.1                                     |
| 17     | butyl-hexadecyl-dimethyl-ammonium               | 83                           | 129.5                                     |
| 18     | tetraheptyl-ammonium                            | 90                           | 84.3                                      |
| 19     | didocosyl-dimethyl-ammonium                     | 90                           | 91.2                                      |
| 20     | tetradodecyl-ammonium                           | 90                           | 79.0                                      |
| 21     | tetraoctyl-ammonium                             | 95                           | 77.2                                      |
| 22     | dodecyl-diethyl-propyl-ammonium                 | 97                           | 102.4                                     |
| 23     | tetrahexyl-ammonium                             | 100                          | 93.7                                      |
| 24     | tetrapentyl-ammonium                            | 100                          | 105.9                                     |
| 25     | triethyl-hexyl-ammonium                         | 105                          | 140.3                                     |
| 26     | triethyl-octyl-ammonium                         | 107.5                        | 132.5                                     |
| 27     | diethyl-methyl-(2,4,4-trimethylpentyl)-ammonium | 110                          | 105.6                                     |
| 28     | tetrabutyl-ammonium                             | 120                          | 125.6                                     |
| 29     | triethyl-heptyl-ammonium                        | 120                          | 135.1                                     |
| 30     | tributyl-methyl-ammonium                        | 120                          | 135.2                                     |
| 31     | hexadecyl-tripropyl-ammonium                    | 120                          | 90.0                                      |
| 32     | ethyl-methyl-bis(3-methylbutyl)-ammonium        | 127                          | 94.1                                      |
| 33     | dodecyl-triethyl-ammonium                       | 130                          | 124.4                                     |
| 34     | (2-methylbutyl)-triethyl-ammonium               | 136                          | 134.8                                     |
| 35     | diicosyl-dimethyl-ammonium                      | 137                          | 90.1                                      |
| 36     | hexadecyl-dimethyl-octyl-ammonium               | 146                          | 118.0                                     |

|    |                                                |     |       |
|----|------------------------------------------------|-----|-------|
| 37 | triethyl-pentyl-ammonium                       | 146 | 147.3 |
| 38 | (2-isopropyl-5-methylhexyl)-trimethyl-ammonium | 152 | 188.0 |
| 39 | hexadecyl-icosyl-dimethyl-ammonium             | 155 | 92.7  |
| 40 | dibutyl-dimethyl-ammonium                      | 166 | 171.0 |
| 41 | triethyl-hexadecyl-ammonium                    | 175 | 116.8 |
| 42 | triethyl-octadecyl-ammonium                    | 180 | 112.8 |
| 43 | trimethyl-pentyl-ammonium                      | 180 | 218.2 |
| 44 | heptyl-trimethyl-ammonium                      | 184 | 207.7 |
| 45 | hexyl-trimethyl-ammonium                       | 186 | 209.6 |
| 46 | dodecyl-ethyl-dimethyl-ammonium                | 188 | 149.5 |
| 47 | ethyl-hexadecyl-dimethyl-ammonium              | 190 | 141.1 |
| 48 | butyl-trimethyl-ammonium                       | 195 | 229.4 |
| 49 | (3-methylbutyl)-trimethyl-ammonium             | 200 | 218.2 |
| 50 | (1-isopropyl-3-methylbutyl)-trimethyl-ammonium | 203 | 245.0 |
| 51 | trimethyl-(4-methylpentyl)-ammonium            | 210 | 178.0 |
| 52 | butyl-triethyl-ammonium                        | 210 | 161.8 |
| 53 | (1-methylheptyl)-trimethyl-ammonium            | 210 | 205.3 |
| 54 | trimethyl-octyl-ammonium                       | 215 | 203.6 |
| 55 | (2-methylbutyl)-trimethyl-ammonium             | 225 | 221.4 |
| 56 | (2-ethyldecyl)-trimethyl-ammonium              | 226 | 138.1 |
| 57 | trimethyl-nonyl-ammonium                       | 230 | 202.7 |
| 58 | trimethyl-propyl-ammonium                      | 240 | 276.6 |
| 59 | decyl-trimethyl-ammonium                       | 240 | 199.1 |
| 60 | trimethyl-(1-butylpentyl)-ammonium             | 240 | 208.0 |
| 61 | (1-ethylpropyl)-trimethyl-ammonium             | 245 | 304.9 |
| 62 | trimethyl-octadecyl-ammonium                   | 250 | 174.7 |
| 63 | dodecyl-trimethyl-ammonium                     | 250 | 194.2 |
| 64 | hexadecyl-trimethyl-ammonium                   | 250 | 181.8 |
| 65 | trimethyl-tetradecyl-ammonium                  | 250 | 188.3 |
| 66 | ethyl-diisopropyl-methyl-ammonium              | 250 | 265.4 |
| 67 | triethyl-isopropyl-ammonium                    | 264 | 223.0 |
| 68 | tetraethyl-ammonium                            | 270 | 280.0 |
| 69 | diethyl-isopropyl-methyl-ammonium              | 277 | 214.4 |
| 70 | tetrapropyl-ammonium                           | 280 | 197.6 |
| 71 | (3,3-dimethylbutyl)-trimethyl-ammonium         | 287 | 324.3 |
| 72 | triethyl-methyl-ammonium                       | 300 | 263.1 |
| 73 | diethyl-dimethyl-ammonium                      | 320 | 285.3 |
| 74 | isopropyl-trimethyl-ammonium                   | 320 | 369.5 |
| 75 | ethyl-trimethyl-ammonium                       | 330 | 323.3 |
