# Supplementary material for: Predicting melting points of quaternary ammonium ionic liquidsElectronic supplementary information (ESI) available: training sets B and C. See http://www.rsc.org/suppdata/gc/b3/b301217d/
Source: Royal Society of Chemistry journal article supplement (doi:10.1039/b301217d), 2003-01-01
Supplement: b301217d(2).pdf [file b301217d%282%29.pdf]

### (n-Hydroxyalkyl)-Trialkyl-Ammonium Bromide Training Set

| Number | Cation Name                                       | T <sub>m,exp</sub> / °C | T <sub>m,pred</sub> / °C with eqn. 3 | T <sub>m,pred</sub> / °C with eqn. 4 |
|--------|---------------------------------------------------|-------------------------|--------------------------------------|--------------------------------------|
| 1      | (2-hydroxyethyl)-dimethyl-pentyl-ammonium         | 50                      | 117.7                                | 131.5                                |
| 2      | dibutyl-hexadecyl-(2-hydroxyethyl)-ammonium       | 55                      | 36.1                                 | 79.3                                 |
| 3      | tributyl-(2-hydroxyethyl)-ammonium                | 58                      | 49.9                                 | 3.0                                  |
| 4      | ethyl-hexadecyl-(2-hydroxyethyl)-methyl-ammonium  | 64                      | 173.6                                | 31.7                                 |
| 5      | didodecyl-(2-hydroxyethyl)-methyl-ammonium        | 65                      | 116.7                                | 115.9                                |
| 6      | diethyl-(2-hydroxyethyl)-tetradecyl-ammonium      | 65                      | 109.1                                | 109.1                                |
| 7      | decyl-(3-hydroxypropyl)-dimethyl-ammonium         | 70                      | 110.5                                | 107.5                                |
| 8      | decyl-diethyl-(2-hydroxyethyl)-ammonium           | 77                      | 91.6                                 | 90.1                                 |
| 9      | hexadecyl-(3-hydroxypropyl)-dimethyl-ammonium     | 85                      | 145.5                                | 122.3                                |
| 10     | (3-hydroxypropyl)-dimethyl-tetradecyl-ammonium    | 86                      | 136.5                                | 127.9                                |
| 11     | didodecyl-ethyl-(2-hydroxyethyl)-ammonium         | 100                     | 69.3                                 | 94.1                                 |
| 12     | (2-hydroxyethyl)-dimethyl-octyl-ammonium          | 115                     | 128.1                                | 138.7                                |
| 13     | (2-hydroxyethyl)-dimethyl-nonyl-ammonium          | 120                     | 136.2                                | 140.3                                |
| 14     | dodecyl-diethyl-(2-hydroxyethyl)-ammonium         | 120                     | 100.7                                | 128.5                                |
| 15     | diethyl-hexadecyl-(2-hydroxyethyl)-ammonium       | 130                     | 116.1                                | 168.7                                |
| 16     | (2-hydroxyethyl)-methyl-dioctadecyl-ammonium      | 130                     | 106.1                                | 141.2                                |
| 17     | diethyl-(2-hydroxyethyl)-octadecyl-ammonium       | 136                     | 121.4                                | 144.7                                |
| 18     | dihexadecyl-(2-hydroxyethyl)-methyl-ammonium      | 150                     | 114.0                                | 102.0                                |
| 19     | decyl-(2-hydroxyethyl)-dimethyl-ammonium          | 155                     | 144.4                                | 144.0                                |
| 20     | (2-hydroxyethyl)-isopropyl-methyl-propyl-ammonium | 155                     | 115.2                                | 147.1                                |
| 21     | diethyl-(3-hydroxypropyl)-methyl-ammonium         | 155                     | 167.9                                | 167.3                                |
| 22     | triethyl-(3-hydroxypropyl)-ammonium               | 165                     | 147.1                                | 129.7                                |
| 23     | trimethyl-(3-hydroxypropyl)-ammonium              | 175                     | 148.4                                | 219.6                                |
| 24     | dodecyl-(2-hydroxyethyl)-dimethyl-ammonium        | 200                     | 159.8                                | 161.4                                |
| 25     | (2-hydroxyethyl)-dimethyl-tetradecyl-ammonium     | 200                     | 172.9                                | 165.4                                |
| 26     | (2-hydroxyethyl)-dimethyl-pentadecyl-ammonium     | 205                     | 178.4                                | 179.7                                |
| 27     | (2-hydroxyethyl)-dimethyl-octadecyl-ammonium      | 210                     | 191.0                                | 186.1                                |
| 28     | hexadecyl-(2-hydroxyethyl)-dimethyl-ammonium      | 225                     | 183.2                                | 180.9                                |
| 29     | (2-hydroxyethyl)-diisopropyl-methyl-ammonium      | 235                     | 268.2                                | 236.8                                |
| 30     | triethyl-(2-hydroxyethyl)-ammonium                | 255                     | 258.0                                | 191.6                                |
| 31     | ethyl-(2-hydroxyethyl)-isopropyl-methyl-ammonium  | 260                     | 184.1                                | 216.2                                |
| 32     | (2-hydroxyethyl)-isopropyl-dimethyl-ammonium      | 275                     | 304.4                                | 250.0                                |
| 33     | ethyl-(2-hydroxyethyl)-dimethyl-ammonium          | 285                     | 262.0                                | 278.3                                |
| 34     | (2-hydroxyethyl)-trimethyl-ammonium               | 300                     | 265.2                                | 321.8                                |
